# Supplementary material
Source: publisher figshare collection journal article supplement (https://diabetesjournals.figshare.com/ndownloader/files/24927479)
Supplement: Supplementary file 1 [file 24927479]

## Sheet: Sheet1
Supplemental Table 1. Fracture Read code list
Read code	Description
7206100	Open reduction of fracture of orbit
7206400	Open reduction of fracture of orbit and internal fixation
7206700	Packing of maxilla to correct blow-out fracture of orbit
7206800	Internal fixation of fracture of orbit
7J02200	Elevation of depressed fracture of cranium
7J02300	Repair of fracture of cranium NEC
7J03.00	Reduction of fracture of facial bone
7J03000	Reduction of fracture of nasoethmoid complex of bones
7J03100	Reduction of fracture of nasal bones NEC
7J03200	Reduction of fracture of zygomatic bones
7J03300	Reduction of closed fracture of orbit bone
7J03y00	Other specified reduction of fracture of facial bone
7J03z00	Reduction of fracture of facial bone NOS
7J12.00	Reduction of fracture of mandible
7J12.11	Reduction of fracture of jaw NEC
7J12000	Reduction of fracture of alveolus of mandible
7J12100	Open reduction of fracture of mandible NEC
7J12200	Closed reduction of fracture of mandible NEC
7J12y00	Other specified reduction of fracture of mandible
7J12z00	Reduction of fracture of mandible NOS
7J13.00	Reduction of fracture of maxilla
7J13000	Reduction of fracture of alveolus of maxilla
7J13100	Open reduction of fracture of maxilla NEC
7J13200	Closed reduction of fracture of maxilla NEC
7J13300	Reduction of blowout fracture of orbital floor
7J13400	Reduction of Le Fort 1 fracture of maxilla
7J13500	Reduction of Le Fort 2 fracture of maxilla
7J13600	Reduction of Le Fort 3 fracture of maxilla
7J13y00	Other specified reduction of fracture of maxilla
7J13z00	Reduction of fracture of maxilla NOS
7J14.00	Fixation of mandible
7J14.11	Fixation of jaw NEC
7J14.12	Fixator of mandible
7J14000	Intermaxillary fixation of mandible
7J14100	Internal fixation of mandible NEC
7J14200	Extraoral fixation of mandible
7J14400	Internal fixation of mandible with plating system
7J14500	Internal fixation of mandible with wire
7J14600	Internal fixation of mandible with arch bars
7J14y00	Other specified fixation of mandible
7J14z00	Fixation of mandible NOS
7J15.00	Fixation of mid facial bones
7J15.11	Fixation of maxilla
7J15000	Intermaxillary fixation of maxilla
7J15100	Internal fixation of maxilla NEC
7J15200	Extraoral fixation of maxilla NEC
7J15400	Fixation of maxilla NEC
7J15500	Internal fixation of bone of face with plating system
7J15600	Internal fixation of bone of face with wire
7J15700	External fixation of bone of face
7J15y00	Other specified fixation of bone of face
7J15z00	Fixation of bone of face NOS
7J17700	Traction for fracture of jaw
7J41.00	Decompression of fracture of spine
7J41000	Complex decompression of fracture of spine
7J41100	Anterior decompression of fracture of spine
7J41200	Posterior decompression of fracture of spine
7J41300	Vertebroplasty of fracture of spine
7J41400	Posterior decompression of fracture of spine NEC
7J41500	Balloon kyphoplasty of fracture of spine
7J41y00	Other specified decompression of fracture of spine
7J41z00	Decompression of fracture of spine NOS
7J42.00	Other reduction of fracture of spine
7J42.11	Other reduction of fracture of spine and stabilisation
7J42000	Open reduction of fracture of spine & excis facet of spine
7J42100	Open reduction of fracture of spine NEC
7J42200	Manipulative reduction of fracture of spine
7J42300	Spinal extension traction for fracture of spine
7J42400	Halo skull traction for fracture of spine
7J42500	Spinal traction for fracture of spine NEC
7J42600	Primary bedrest stabilisation of spinal fracture
7J42700	Primary collar stabilisation of spinal fracture
7J42800	Primary skull traction stabilisation of spinal fracture
7J42900	Primary cast stabilisation of spinal fracture
7J42A00	Primary external fixation stabilisation of spinal fracture
7J42B00	Primary other external stabilisation of spinal fracture
7J42J00	Primary closed reduction spinal fracture alone
7J42K00	Primary cls reduction spinal fracture+collar stabilisation
7J42L00	Primary cls reduction spinal fracture+bedrest stabilisation
7J42M00	Primary cls reduc spinal fracture+skull traction stabilisatn
7J42N00	Primary cls reduction spinal fracture+cast stabilisation
7J42P00	Primary cls reduction spinal fracture+external fixation
7J42Q00	Primary cls reduct spinal fracture+oth external stabilisatn
7J42Y00	Primary open reduction spinal fracture alone
7J42Z00	Primary opn reduction spinal fracture+collar stabilisation
7J42a00	Primary opn reduction spinal fracture+bedrest stabilisation
7J42b00	Primary opn reduc spinal fracture+skull traction stabilisatn
7J42c00	Primary opn reduction spinal fracture+cast stabilisation
7J42d00	Primary open reduction spinal fracture and external fixation
7J42e00	Primary opn reduc spinal fracture+other external stabilisatn
7J42y00	Other specified other reduction of fracture of spine
7J42z00	Other reduction of fracture of spine NOS
7J43.00	Fixation of fracture of spine
7J43.11	Internal fixation of fracture of spine
7J43000	Primary open reduc spinal fracture+internal fix+plate
7J43100	Fixation of fracture of spine using Harrington rod
7J43200	Fixation of fracture of spine and skull traction HFQ
7J43211	Barr skull traction for fracture of spine
7J43212	Crutchfield skull traction for fracture of spine
7J43300	Primary open reduc spinal fracture+internal fix+wire
7J43400	Primary open reduc spinal fracture+internal fix+rod system
7J43500	Primary open reduc spinal #+intern fix+segmental wire system
7J43600	Primary open reduc spinal #+internal fix+internal fixator
7J43700	Primary open reduc spinal fracture+other internal fix
7J43y00	Other specified fixation of fracture of spine
7J43z00	Fixation of fracture of spine NOS
7K14.00	Open surgical fracture of bone
7K1D.00	Primary open reduction fracture bone & intramedull fixation
7K1D000	Prmy open red+int fxn prox femoral #+screw/nail+plate device
7K1D011	Prim open reduct # neck femur & op fix - Blount nail plate
7K1D012	Prim op red # nck femur & op fix- Charnley compression screw
7K1D013	Prim op red # nck femur & op fix - Deyerle multiple hip pin
7K1D014	Prim open reduct # neck femur & op fix - Holt nail
7K1D015	Prim open reduct # neck femur & op fix - Jewett nail plate
7K1D016	Prim open reduct # neck femur & op fix - Massie nail plate
7K1D017	Prim open red # neck femur & op fix - McLaughlin nail plate
7K1D018	Prim open reduct # neck femur & op fix - Neufield nail plate
7K1D019	Prim open reduct # neck femur & op fix - Pugh nail plate
7K1D01A	Prim open reduct # neck femur & op fix - Richards screw
7K1D01B	Prim open reduct # neck femur & op fix - Ross Brown nail
7K1D01C	Prim open reduct # neck femur & op fix - Thornton nail plate
7K1D01D	Prim op red # nck femur & op fix- Zickel intramed nail plate
7K1D01E	DHS - Dynamic hip screw primary fixation of neck of femur
7K1D01F	Dynamic hip screw primary fixation of neck of femur
7K1D100	Prim open reduct fract long bone & fixation rigid nail NEC
7K1D111	Kuntschner intramedullary fixation
7K1D200	Prim open reduct fract long bone & fixation flexible nail
7K1D211	Prim open red # long bone & fix - Ender flexi intramed nail
7K1D212	Prim open red # long bone & fix - Rush flexi intramedul nail
7K1D300	Prim open reduction fract small bone & fixation using screw
7K1D400	Prim open reduction fragment of bone & fixation using screw
7K1D411	Prim open reduction fragment of bone & fix - Herbert screw
7K1D500	Prim open reduction fragment bone & fixation using wire syst
7K1D511	K wiring of fracture
7K1D512	Fixation of bone fragment using Kirschner wire
7K1D600	Prmy open red+int fxn prox femoral #+screw/nail device alone
7K1D800	Prmy open reduction #+locked reamed intramedullary nail fxtn
7K1D900	Prmy open red #+locked unreamed intramedullary nail fixation
7K1DA00	Prmy open red #+unlocked reamed intramedullary nail fixation
7K1DB00	Prmy open reduction #+unlocked unreamed intramedullary nail
7K1DC00	Prmy open reduction of #+internal fixation with K-wire
7K1DD00	Prmy open reduction of #+intramedullary nail fixation
7K1Dy00	Prim open reduction fracture bone & intramedullary fixatn OS
7K1Dz00	Prim open reduction fracture bone & intramedull fixation NOS
7K1E.00	Primary open reduction fract bone & extramedullary fixation
7K1E000	Prmy open reduction of #+internal fixation with plate NEC
7K1E011	Prim open reduct fract long bone & fix using Eggers plate
7K1E012	Prim open reduct fract long bone & fix using Ellis plate
7K1E013	Prim open reduct fract long bone & fix using Hicks plate
7K1E100	Prmy open reduction #+internal fixation with cerclage wiring
7K1E111	Prim open reduct fract long bone & extramedul fixat cerclage
7K1E112	Prim open reduct # long bone & fix - Parham circlage band
7K1E200	Prim open reduct fract long bone & extramedull fixatn suture
7K1E300	Prim open reduc fract long bone & cmplx extramedul fixat NEC
7K1E400	Prim open reduct fract ankle & complex extramedull fixat NEC
7K1E600	Prmy open reduction # elbow+fixation with Hook fixtn plate
7K1E611	Prim open reduction # elbow & fixatn c Zuezler fixatn plate
7K1E700	Prmy open reduction #+internal fxn with tension band wiring
7K1E800	Prmy open reduction of #+internal fixation with screw(s)
7K1E900	Prmy open reduction #+int fxtn with multiple implant types
7K1EA00	Prim open reduct fract ankle & extramedull fixat NEC
7K1EB00	Prim open reduct fract ankle & complex extramedull fixat NEC
7K1Ey00	Prmy open reduction #+other int(extramedullary) fixation
7K1Ez00	Prim open reduction fracture bone & extramedull fixation NOS
7K1F.00	Primary open reduction of intraarticular fracture of bone
7K1F000	Primary reduction intraarticular fract bone using arthrotomy
7K1F100	Primary excis intraarticular fragment intraartic fract bone
7K1F200	Prim fixat fragment chondral cartilage intraartic fract bone
7K1F300	Primary intraarticular fixation intraartic fracture bone NEC
7K1F400	Prim extraarticular reduction intraartic fracture bone NEC
7K1F500	Primary open reduction fracture patella fixat tension band
7K1Fy00	Primary open reduction of intraarticular fracture bone OS
7K1Fz00	Primary open reduction of intraarticular fracture bone NOS
7K1G.00	Other primary open reduction of fracture of bone
7K1G000	Prmy open reduction of fracture and skeletal traction
7K1G100	Prmy open reduction of fracture and external fixation
7K1G200	Primary open reduction+external fixation of femoral fracture
7K1G300	Primary open reduction of fracture alone
7K1G400	Primary open reduction of fracture and cast immobilisation
7K1G500	Primary open reduction of fracture and functional bracing
7K1G600	Primary open reduction of fracture and skin traction
7K1Gy00	Primary open reduction of #+other ext immobilisation
7K1Gy11	Primary open reduction of bone fracture & external fixation
7K1Gz00	Other primary open reduction of fracture of bone NOS
7K1H400	Secondary open reduct fracture bone & external fixation HFQ
7K1J.00	Closed (or no) reduction of fracture and internal fixation
7K1J000	Cls red+int fxn proximal femoral #+screw/nail device alone
7K1J011	Cl red intracaps frac neck femur fix-Garden cannulated screw
7K1J012	Cl red intracaps fract neck femur fix - Smith-Petersen nail
7K1J013	Cls red+int fxn prox femoral #+Richard's cannulat hip screw
7K1J100	Closed reduction fract long bone & rigid internal fixatn NEC
7K1J200	Closed reduction fract long bone & flexible intern fixat HFQ
7K1J300	Closed reduction fracture small bone & fixation using screw
7K1JH00	Primary wire fixation of fracture
7K1JK00	Primary closed reduction of fracture and wire fixation
7K1JM00	Primary cls reduction #+locked reamed intramed nail fxn
7K1JN00	Primary cls reduction #+locked unreamed intramed nail fxn
7K1JP00	Primary cls reduction #+unlocked reamed intramed nail fxn
7K1JQ00	Primary cls reduction #+unlocked unreamed intramed nail fxn
7K1JR00	Primary closed reduction #+internal fixation with wire
7K1JS00	Primary closed reduction #+internal fixation with screw(s)
7K1JT00	Primary closed reduction #+other internal fixation
7K1Jb00	Primary closed reduction #+intramed nail fixation
7K1Jd00	Closed reduction of intracapsular # NOF internal fixat DHS
7K1Jy00	Closed reduction of bone fracture and internal fixation OS
7K1Jz00	Closed reduction of bone fracture and internal fixation NOS
7K1K.00	Closed (or no) reduction of fracture and external fixation
7K1K000	Closed reduction fracture bone and fixation to skeleton HFQ
7K1K100	Closed reduct fract bone and fixat functional bracing system
7K1K300	Primary external fixation(without reduction) prox femoral #
7K1K400	Revision to ext fxn(without reduction) proximal femoral #
7K1K500	Primary cls reduction+external fixation proximal femoral #
7K1K700	Primary functional bracing of fracture
7K1K800	Primary external fixation of fracture
7K1K900	Other primary external immobilisation of fracture
7K1KD00	Primary closed reduction of fracture and functional bracing
7K1KE00	Primary closed reduction of fracture and external fixation
7K1KH00	Primary closed reduction of # + oth external immobilisation
7K1Ky00	Closed reduction of bone fracture and external fixation OS
7K1Kz00	Closed reduction of bone fracture and external fixation NOS
7K1Kz11	Closed reduction bone fract & fix with Gissane spike fixator
7K1L.00	Other closed reduction of fracture of bone
7K1L000	Primary closed reduction of # and skeletal traction NEC
7K1L011	Manipulation of fracture and skeletal traction NEC
7K1L100	Manipulation of fracture of bone NEC
7K1L400	Closed reduction of fracture of hip
7K1L500	Closed reduction of fracture of femur
7K1L600	Closed reduction of fracture of knee
7K1L700	Closed reduction of fracture of tibia and or fibula
7K1L800	Closed reduction of fracture of ankle
7K1L900	Closed reduction of fracture of metatarsus
7K1LA00	Closed reduction of fracture of toe
7K1LB00	Closed reduction of fracture of hallux
7K1LC00	Closed reduction of fracture of lower limb
7K1LC11	Closed reduction # leg
7K1LD00	Closed reduction of fracture of nasal bone
7K1LE00	Closed reduction of fracture of elbow
7K1LF00	Closed reduction of fracture of humerus
7K1LG00	Closed reduction of fracture of shoulder
7K1LH00	Closed reduction of fracture of finger
7K1LJ00	Closed reduction of fracture of thumb
7K1LK00	Closed reduction of fracture of metacarpus
7K1LL00	Closed reduction of fracture of radius and or ulna
7K1LM00	Closed reduction of fracture of wrist
7K1LN00	Closed reduction of fracture of upper limb
7K1LN11	Closed reduction # arm
7K1LT00	Primary closed reduction of fracture and cast immobilisation
7K1LV00	Primary closed reduction of fracture alone
7K1LW00	Primary closed reduction of fracture and skin traction
7K1LZ00	Primary skin traction of fracture
7K1Lb00	Primary cast immobilisation of fracture
7K1Ld00	Primary arthroscopic reduction of fracture
7K1Le00	Primary arthroscopic reduction and fixation of fracture
7K1Ly00	Other specified other closed reduction of fracture of bone
7K1Lz00	Other closed reduction of fracture of bone NOS
7K1N900	Primary skeletal traction of fracture
7K1P.00	Other fixation of bone
7K1P000	Application of internal fixator NEC
7K1P100	Application of external fixator NEC
7K1P111	Application of Anderson external fixator
7K1P112	Applicatin of Henderson external fixator
7K1P113	Application of Wagner external fixator
7K1P600	Internal fixation of bone NEC
7K1P700	External fixation of bone NEC
7K1PE00	Insertion of intramedullary fixation and cementing of bone
7K1Pw00	Other specified internal fixation of bone
7K1Px00	Internal fixation of bone NOS
7K1Py00	Other specified other fixation of bone
7K1Pz00	Other fixation of bone NOS
7K1T100	Debridement of open fracture
7K6F200	Primary open reduction of fracture dislocation of joint NEC
7K6F400	Open reduction of # dislocation of joint+fxn of jnt,unspec
7K6FE00	Primary open reduction of fracture dislocation alone
7K6FF00	Primary open reduction of # dislocation+cast immobilisation
7K6FG00	Primary open reduction of # dislocation+functional bracing
7K6FH00	Primary open reduction of # dislocation+skin traction
7K6FJ00	Primary open reduction of # dislocation+wire fixation
7K6FK00	Primary open reduction of # dislocation+external fixation
7K6FL00	Primary open reduction # dislocation+other external immobil
7K6FM00	Primary open reduction of # dislocation+fixation+screw(s)
7K6FN00	Primary open reduction of # dislocation+fixation+plate(s)
7K6FP00	Primary open reduction # dislocation+other jnt stabilisation
7K6FQ00	Primary open reduction # dislocation joint internal fix NEC
7K6FR00	Primary open reduct # dislocat joint comb int external fix
7K6G000	Primary closed reduction # dislocation jnt+skeletal traction
7K6G200	Primary manipulative closed reduct fract dislocat joint NEC
7K6GK00	Prim closed reduc fract dislocat joint and internal fixation
7K6GM00	Closed reduction of dislocation of joint & internal fixation
7K6GN00	Closed reduction fracture disloc joint & internal fixation
7K6GX00	Primary closed reduction of fracture dislocation alone
7K6GY00	Primary closed reduction of # dislocation+cast immobil
7K6GZ00	Primary closed reduction of # dislocation+functional bracing
7K6Ga00	Primary closed reduction of # dislocation+skin traction
7K6Gb00	Primary closed reduction # dislocation+fixation by wire(s)
7K6Gc00	Primary closed reduction of # dislocation+external fixation
7K6Gd00	Primary closed reduction # dislocation+other extrnal immobil
7K6J000	Open reduction injury growth plate and internal fixation HFQ
7K6J300	Closed reduction injury growth plate & internal fixation HFQ
82...11	Closed reduction of fracture
N1y1.00	Fatigue fracture of vertebra
N1y2.00	Pars interarticularis stress fracture
S0...00	Fracture of skull
S00..00	Fracture of vault of skull
S00..11	Frontal bone fracture
S00..12	Parietal bone fracture
S000.00	Closed fracture vault of skull without intracranial injury
S000000	Closed #skull vlt no intracranial injury, unspec state consc
S000100	Closed #skull vlt no intracranial injury, no loss of consc
S000200	Closed #skull vlt no intracranial injury, <1hr loss of consc
S000300	Closed #skull vlt no intracranial injury, 1-24hr loss consc
S000400	Closed #skull vlt no intracranial injury, >24hr LOC+recovery
S000500	Closed #skull vlt no intracranial inj,>24hr LOC not restored
S000600	Closed #skull vlt no intracranial inj, LOC unspec duration
S000z00	Closed #skull vlt no intracranial injury + concussion unspec
S001.00	Closed fracture vault of skull with intracranial injury
S001000	Closed #skull vlt + intracranial injury, unspec state consc
S001100	Closed #skull vlt + intracranial injury, no loss of consc
S001200	Closed #skull vlt + intracranial injury, <1hr loss of consc
S001300	Closed #skull vlt + intracranial injury, 1-24hr loss consc
S001400	Closed #skull vlt + intracranial injury, >24hr LOC+recovery
S001500	Closed #skull vlt + intracranial inj, >24hr LOC not restored
S001600	Closed #skull vlt + intracranial injury, LOC unspec duration
S001z00	Closed #skull vlt with intracranial injury+concussion unspec
S002.00	Open fracture vault of skull without intracranial injury
S002000	Open #skull vlt no intracranial injury, unspec state consc
S002100	Open #skull vlt no intracranial injury, no loss of consc
S002200	Open #skull vlt no intracranial injury, <1hr loss of consc
S002300	Open #skull vlt no intracranial injury, 1-24hr loss of consc
S002400	Open #skull vlt no intracranial injury, >24hr LOC+recovery
S002500	Open #skull vlt no intracranial inj, >24hr LOC not restored
S002600	Open #skull vlt no intracranial injury, LOC unspec duration
S002z00	Open #skull vlt no intracranial injury + concussion unspec
S003.00	Open fracture vault of skull with intracranial injury
S003000	Open #skull vlt + intracranial injury, unspec state of consc
S003100	Open #skull vlt + intracranial injury, no loss of consc
S003200	Open #skull vlt + intracranial injury, <1hr loss of consc
S003300	Open #skull vlt + intracranial injury, 1-24hr loss of consc
S003400	Open #skull vlt + intracranial injury, >24hr LOC + recovery
S003500	Open #skull vlt + intracranial inj, >24hr LOC not restored
S003600	Open #skull vlt + intracranial injury, LOC unspec duration
S003z00	Open #skull vlt with intracranial injury + concussion unspec
S00z.00	Fracture of vault of skull NOS
S01..00	Fracture of base of skull
S01..11	Anterior fossa fracture
S01..12	Ethmoid sinus fracture
S01..13	Frontal sinus fracture
S01..14	Middle fossa fracture
S01..15	Occiput bone fracture
S01..16	Orbital roof fracture
S01..17	Posterior fossa fracture
S01..18	Sphenoid bone fracture
S01..19	Temporal bone fracture
S010.00	Closed fracture base of skull without intracranial injury
S010000	Closed #skull bse no intracranial injury, unspec state consc
S010100	Closed #skull bse no intracranial injury, no loss of consc
S010200	Closed #skull bse no intracranial injury, <1hr loss of consc
S010300	Closed #skull bse no intracranial injury, 1-24hr loss consc
S010400	Closed #skull bse no intracranial injury, >24hr LOC+recovery
S010500	Closed #skull bse no intracranial inj,>24hr LOC not restored
S010600	Closed #skull bse no intracranial inj, LOC unspec duration
S010z00	Closed #skull bse no intracranial injury + concussion unspec
S011.00	Closed fracture base of skull with intracranial injury
S011000	Closed #skull bse + intracranial inj, unspec state of consc
S011100	Closed #skull bse + intracranial injury, no loss of consc
S011200	Closed #skull bse + intracranial injury, <1hr loss of consc
S011300	Closed #skull bse + intracranial injury, 1-24hr loss consc
S011400	Closed #skull bse + intracranial injury, >24hr LOC+recovery
S011500	Closed #skull bse + intracranial inj, >24hr LOC not restored
S011600	Closed #skull bse + intracranial injury, LOC unspec duration
S011z00	Closed #skull bse + intracranial injury + concussion unspec
S012.00	Open fracture base skull without mention intracranial injury
S012000	Open #skull bse no intracranial inj, unspec state of consc
S012100	Open #skull bse no intracranial injury, no loss of consc
S012200	Open #skull bse no intracranial injury, <1hr loss of consc
S012300	Open #skull bse no intracranial injury, 1-24hr loss of consc
S012400	Open #skull bse no intracranial injury, >24hr LOC+recovery
S012500	Open #skull bse no intracranial inj, >24hr LOC not restored
S012600	Open #skull bse no intracranial injury, LOC unspec duration
S012z00	Open #skull bse no intracranial injury + concussion unspec
S013.00	Open fracture base of skull with intracranial injury
S013000	Open #skull bse + intracranial injury, unspec state of consc
S013100	Open #skull bse + intracranial injury, no loss of consc
S013200	Open #skull bse + intracranial injury, <1hr loss of consc
S013300	Open #skull bse + intracranial injury, 1-24hr loss of consc
S013400	Open #skull bse + intracranial injury, >24hr LOC + recovery
S013500	Open #skull bse + intracranial inj, >24hr LOC not restored
S013600	Open #skull bse + intracranial injury, LOC unspec duration
S013z00	Open #skull bse + intracranial injury + concussion unspec
S01z.00	Fracture of base of skull NOS
S02..00	Fracture of face bones
S020.00	Closed fracture nose
S020.11	Closed fracture nasal bone
S021.00	Open fracture nose
S021.11	Open fracture nasal bone
S022.00	Fracture of mandible, closed
S022.11	Fracture of inferior maxilla, closed
S022.12	Fracture of lower jaw, closed
S022000	Closed fracture mandible (site unspecified)
S022100	Closed fracture of mandible, condylar process
S022200	Closed fracture of mandible, subcondylar
S022300	Closed fracture of mandible, coronoid process
S022400	Closed fracture of mandible, ramus, unspecified
S022500	Closed fracture of mandible, angle of jaw
S022600	Closed fracture of mandible, symphysis of body
S022700	Closed fracture of mandible, alveolar border of body
S022800	Closed fracture of mandible, body, other and unspecified
S022x00	Closed fracture of mandible, multiple sites
S022z00	Fracture of mandible, closed, NOS
S023.00	Fracture of mandible, open
S023.11	Fracture of lower jaw, open
S023000	Open fracture mandible (site unspecified)
S023100	Open fracture of mandible, condylar process
S023200	Open fracture of mandible, subcondylar
S023300	Open fracture of mandible, coronoid process
S023400	Open fracture of mandible, ramus, unspecified
S023500	Open fracture of mandible, angle of jaw
S023600	Open fracture of mandible, symphysis of body
S023700	Open fracture of mandible, alveolar border of body
S023800	Open fracture of mandible, body, other and unspecified
S023x00	Open fracture of mandible, multiple sites
S023z00	Fracture of mandible, open, NOS
S024.00	Fracture of malar or maxillary bones, closed
S024.11	Fracture of upper jaw, closed
S024000	Closed fracture maxilla
S024100	Closed fracture zygoma
S024z00	Fracture of malar or maxillary bones, closed, NOS
S025.00	Fracture of malar or maxillary bones, open
S025.11	Fracture of upper jaw, open
S025000	Open fracture maxilla
S025100	Open fracture zygoma
S025z00	Fracture of malar or maxillary bones, open, NOS
S026.00	Closed orbital blow-out fracture
S027.00	Open orbital blow-out fracture
S028.00	Fracture of skull and facial bones
S028000	Fracture of nasal bones
S028100	Fracture of orbital floor
S028200	Fracture of malar and maxillary bones
S028300	Fracture of mandible
S02A.00	Le Fort I fracture maxilla
S02B.00	Le Fort II fracture maxilla
S02C.00	Le Fort III fracture maxilla
S02x.00	Closed fracture other facial bone
S02x000	Fracture of alveolus, closed
S02x100	Fracture of orbit NOS, closed
S02x200	Fracture of palate, closed
S02xz00	Fracture of other facial bones, closed, NOS
S02y.00	Open fracture other facial bone
S02y000	Fracture of alveolus, open
S02y100	Fracture of orbit NOS, open
S02y200	Fracture of palate, open
S02yz00	Fracture of other facial bones,open, NOS
S02z.00	Fracture of facial bone NOS
S02z.11	Jaw fracture NOS
S03..00	Other and unqualified skull fractures
S030.00	Closed fracture of skull NOS without intracranial injury
S030000	Closed #skull NOS no intracranial inj, unspec state of consc
S030100	Closed #skull NOS no intracranial inj, no loss of consc
S030200	Closed #skull NOS no intracranial inj, <1hr loss of consc
S030300	Closed #skull NOS no intracranial inj, 1-24hr loss of consc
S030400	Closed #skull NOS no intracranial inj, >24hrs LOC + recovery
S030500	Closed #skull NOS no intracranial inj,>24hr LOC not restored
S030600	Closed #skull NOS no intracranial inj, LOC unspec duration
S030z00	Closed #skull NOS no intracranial inj + concussion unspec
S031.00	Closed fracture of skull NOS with intracranial injury
S031000	Closed #skull NOS + intracranial inj, unspec state of consc
S031100	Closed #skull NOS + intracranial inj, no loss of consc
S031200	Closed #skull NOS + intracranial inj, <1hr loss of consc
S031300	Closed #skull NOS + intracranial inj, 1-24hrs loss of consc
S031400	Closed #skull NOS + intracranial inj, >24hrs LOC + recovery
S031500	Closed #skull NOS + intracranial inj, >24hr LOC not restored
S031600	Closed #skull NOS + intracranial inj, LOC unspec duration
S031z00	Closed #skull NOS + intracranial inj + concussion unspec
S032.00	Open #skull NOS without mention of intracranial injury
S032000	Open #skull NOS no intracranial inj, unspec state of consc
S032100	Open #skull NOS no intracranial inj, no loss of consc
S032200	Open #skull NOS no intracranial inj, <1hr loss of consc
S032300	Open #skull NOS no intracranial inj, 1-24hrs loss of consc
S032400	Open #skull NOS no intracranial inj, >24hrs LOC + recovery
S032500	Open #skull NOS no intracranial inj, >24hrs LOC not restored
S032600	Open #skull NOS no intracranial inj, LOC unspec duration
S032z00	Open #skull NOS no intracranial inj + concussion unspec
S033.00	Open fracture of skull NOS with intracranial injury
S033000	Open #skull NOS + intracranial inj, unspec state of consc
S033100	Open #skull NOS + intracranial inj, no loss of consc
S033200	Open #skull NOS + intracranial inj, <1hr loss of consc
S033300	Open #skull NOS + intracranial inj, 1-24hrs loss of consc
S033400	Open #skull NOS + intracranial inj, >24hrs LOC + recovery
S033500	Open #skull NOS + intracranial inj, >24hrs LOC not restored
S033600	Open #skull NOS + intracranial inj, LOC unspec duration
S033z00	Open #skull NOS + intracranial inj + concussion unspec
S03z.00	Skull fracture NOS
S03z.11	Depressed skull fracture NOS
S04..00	Multiple fractures involving skull or face with other bones
S04..11	Multiple face fractures
S04..12	Multiple skull fractures
S040.00	Mult #skull/face+other bones, closed, no intracranial injury
S040000	Closed #skull/face, mult, no intracranial inj, unspec consc
S040100	Closed #skull/face, mult, no intracranial inj, no loss consc
S040200	Closed #skull/face, mult, no intracranial inj, <1hr LOC
S040300	Closed #skull/face, mult, no intracranial inj, 1-24hrs LOC
S040400	Closed #skull/face, mult,no intracran inj,>24hr LOC+recovery
S040500	Closed #skull/face,mult,no intracran inj,>24hr LOC-restored
S040600	Closed #skull/face,mult,no intracran inj,LOC unspec duration
S040z00	Closed #skull/face,mult,no intracran inj, concussion unspec
S041.00	Mult #skull/face+other bones, closed + intracranial injury
S041000	Closed #skull/face, mult + intracranial inj, unspec consc
S041100	Closed #skull/face, mult + intracranial inj, no loss consc
S041200	Closed #skull/face, mult + intracranial inj, <1hr LOC
S041300	Closed #skull/face, mult + intracranial inj, 1-24hrs LOC
S041400	Closed #skull/face, mult+intracran inj, >24hr LOC+recovery
S041500	Closed #skull/face, multi+intracran inj, >24hr LOC-restored
S041600	Closed #skull/face,mult + intracran inj, LOC unspec duration
S041z00	Closed #skull/face,mult + intracran inj, concussion unspec
S042.00	Mult #skull/face + other bones, open, no intracranial injury
S042000	Open #skull/face, mult, no intracranial inj, unspec consc
S042100	Open #skull/face, mult, no intracranial inj, no loss consc
S042200	Open #skull/face, mult, no intracranial inj, <1hr LOC
S042300	Open #skull/face, mult, no intracranial inj, 1-24hrs LOC
S042400	Open #skull/face, mult, no intracran inj, >24hr LOC+recovery
S042500	Open #skull/face,mult,no intracran inj,>24hr LOC no restored
S042600	Open #skull/face,mult,no intracran inj, LOC unspec duration
S042z00	Open #skull/face,mult,no intracran inj, concussion unspec
S043.00	Mult #skull/face + other bones, open + intracranial injury
S043000	Open #skull/face, mult + intracranial inj, unspec consc
S043100	Open #skull/face, mult + intracranial inj, no loss consc
S043200	Open #skull/face, mult + intracranial inj, <1hr LOC
S043300	Open #skull/face, mult + intracranial inj, 1-24hrs LOC
S043400	Open #skull/face, mult + intracran inj, >24hr LOC + recovery
S043500	Open #skull/face,mult + intracran inj, >24hr LOC no restored
S043600	Open #skull/face, mult + intracran inj, LOC unspec duration
S043z00	Open #skull/face, mult + intracran inj + concussion, unspec
S044.00	Multiple fractures involving skull and facial bones
S04z.00	Multiple fractures involving skull/face with other bones NOS
S0z..00	Fracture of skull NOS
S1...00	Fracture of neck and trunk
S10..00	Fracture of spine without mention of spinal cord injury
S10..11	Fracture of transverse process spine - no spinal cord lesion
S10..12	Fracture of vertebra without spinal cord lesion
S100.00	Closed fracture of cervical spine
S100.11	Closed fracture of atlas without spinal cord lesion
S100.12	Closed fracture of axis without spinal cord lesion
S100000	Closed fracture of unspecified cervical vertebra
S100100	Closed fracture atlas
S100111	C1 vertebra closed fracture - no spinal cord lesion
S100200	Closed fracture axis
S100211	C2 vertebra closed fracture without spinal cord lesion
S100300	Closed fracture of third cervical vertebra
S100311	C3 vertebra closed fracture without spinal cord lesion
S100400	Closed fracture of fourth cervical vertebra
S100411	C4 vertebra closed fracture without spinal cord lesion
S100500	Closed fracture of fifth cervical vertebra
S100511	C5 vertebra closed fracture without spinal cord lesion
S100600	Closed fracture of sixth cervical vertebra
S100611	C6 vertebra closed fracture without spinal cord lesion
S100700	Closed fracture of seventh cervical vertebra
S100711	C7 vertebra closed fracture without spinal cord lesion
S100800	Closed fracture atlas, isolated arch or articular process
S100900	Closed fracture atlas, comminuted
S100A00	Closed fracture axis, odontoid process
S100B00	Closed fracture axis, spondylolysis
S100C00	Closed fracture axis, spinous process
S100D00	Closed fracture axis, transverse process
S100E00	Closed fracture axis, posterior arch
S100F00	Closed fracture axis, tricolumnar
S100G00	Closed fracture cervical vertebra, burst
S100H00	Closed fracture cervical vertebra, wedge
S100J00	Closed fracture cervical vertebra, spondylolysis
S100K00	Closed fracture cervical vertebra, spinous process
S100L00	Closed fracture cervical vertebra, transverse process
S100M00	Closed fracture cervical vertebra, posterior arch
S100N00	Closed fracture cervical vertebra, tricolumnar
S100x00	Multiple closed fractures of cervical vertebrae
S100z00	Closed fracture of cervical spine not otherwise specified
S101.00	Open fracture of cervical spine
S101.11	Open fracture of atlas without spinal cord lesion
S101.12	Open fracture of axis without spinal cord lesion
S101000	Open fracture of unspecified cervical vertebra
S101100	Open fracture atlas
S101111	C1 vertebra open fracture without spinal cord lesion
S101200	Open fracture axis
S101211	C2 vertebra open fracture without spinal cord lesion
S101300	Open fracture of third cervical vertebra
S101311	C3 vertebra open fracture without spinal cord lesion
S101400	Open fracture of fourth cervical vertebra
S101411	C4 vertebra open fracture without spinal cord lesion
S101500	Open fracture of fifth cervical vertebra
S101511	C5 vertebra open fracture without spinal cord lesion
S101600	Open fracture of sixth cervical vertebra
S101611	C6 vertebra open fracture without spinal cord lesion
S101700	Open fracture of seventh cervical vertebra
S101711	C7 vertebra open fracture without spinal cord lesion
S101800	Open fracture atlas, isolated arch or articular process
S101900	Open fracture atlas, comminuted
S101A00	Open fracture axis, odontoid process
S101B00	Open fracture axis, spondylolysis
S101C00	Open fracture axis, spinous process
S101D00	Open fracture axis, transverse process
S101E00	Open fracture axis, posterior arch
S101F00	Open fracture axis, tricolumnar
S101G00	Open fracture cervical vertebra, burst
S101H00	Open fracture cervical vertebra, wedge
S101J00	Open fracture cervical vertebra, spondylolysis
S101K00	Open fracture cervical vertebra, spinous process
S101L00	Open fracture cervical vertebra, transverse process
S101M00	Open fracture cervical vertebra, posterior arch
S101N00	Open fracture cervical vertebra, tricolumnar
S101x00	Multiple open fractures of cervical vertebrae
S101z00	Open fracture of cervical spine not otherwise specified
S102.00	Closed fracture thoracic vertebra
S102000	Closed fracture thoracic vertebra, burst
S102100	Closed fracture thoracic vertebra, wedge
S102200	Closed fracture thoracic vertebra, spondylolysis
S102300	Closed fracture thoracic vertebra, spinous process
S102400	Closed fracture thoracic vertebra, transverse process
S102500	Closed fracture thoracic vertebra, posterior arch
S102600	Closed fracture thoracic vertebra, tricolumnar
S102y00	Other specified closed fracture thoracic vertebra
S102z00	Closed fracture thoracic vertebra not otherwise specified
S103.00	Open fracture thoracic vertebra
S103000	Open fracture thoracic vertebra, burst
S103100	Open fracture thoracic vertebra, wedge
S103200	Open fracture thoracic vertebra, spondylolysis
S103300	Open fracture thoracic vertebra, spinous process
S103400	Open fracture thoracic vertebra, transverse process
S103500	Open fracture thoracic vertebra, posterior arch
S103600	Open fracture thoracic vertebra, tricolumnar
S104.00	Closed fracture lumbar vertebra
S104000	Closed fracture lumbar vertebra, burst
S104100	Closed fracture lumbar vertebra, wedge
S104200	Closed fracture lumbar vertebra, spondylolysis
S104300	Closed fracture lumbar vertebra, spinous process
S104400	Closed fracture lumbar vertebra, transverse process
S104500	Closed fracture lumbar vertebra, posterior arch
S104600	Closed fracture lumbar vertebra, tricolumnar
S105.00	Open fracture lumbar vertebra
S105000	Open fracture lumbar vertebra, burst
S105100	Open fracture lumbar vertebra, wedge
S105200	Open fracture lumbar vertebra, spondylolysis
S105300	Open fracture lumbar vertebra, spinous process
S105400	Open fracture lumbar vertebra, transverse process
S105500	Open fracture lumbar vertebra, posterior arch
S105600	Open fracture lumbar vertebra, tricolumnar
S106.00	Closed fracture sacrum
S106000	Closed compression fracture sacrum
S106100	Closed vertical fracture of sacrum
S107.00	Open fracture sacrum
S107000	Open compression fracture sacrum
S107100	Open vertical fracture of sacrum
S108.00	Closed fracture pelvis, coccyx
S109.00	Open fracture pelvis, coccyx
S10A.00	Fracture of neck
S10A000	Fracture of first cervical vertebra
S10A100	Fracture of second cervical vertebra
S10A200	Multiple fractures of cervical spine
S10B.00	Fracture of lumbar spine and pelvis
S10B000	Fracture of lumbar vertebra
S10B100	Fracture of sacrum
S10B200	Fracture of coccyx
S10B300	Fracture of ilium
S10B400	Fracture of acetabulum
S10B500	Fracture of pubis
S10B600	Multiple fractures of lumbar spine and pelvis
S10x.00	Closed fracture of spine, unspecified,
S10y.00	Open fracture of spine, unspecified,
S10z.00	Fracture of spine without mention of spinal cord lesion NOS
S11..00	Fracture of spine with spinal cord lesion
S11..11	Fracture of transverse process of spine + spinal cord lesion
S11..12	Fracture of vertebra with spinal cord lesion
S110.00	Closed fracture of cervical spine with cord lesion
S110000	Cls spinal fracture with unspec cervical cord lesion, C1-4
S110100	Cls spinal fracture with complete cervcl cord lesion, C1-4
S110200	Cls spinal fracture with anterior cervcl cord lesion, C1-4
S110300	Cls spinal fracture with central cervical cord lesion, C1-4
S110400	Cls spinal fracture with posterior cervcl cord lesion, C1-4
S110600	Cls spinal fracture with unspec cervical cord lesion, C5-7
S110700	Cls spinal fracture with complete cervcl cord lesion, C5-7
S110800	Cls spinal fracture with anterior cervcl cord lesion, C5-7
S110900	Cls spinal fracture with central cervical cord lesion, C5-7
S110A00	Cls spinal fracture with posterior cervcl cord lesion, C5-7
S110z00	Closed fracture of cervical spine with cord lesion NOS
S111.00	Open fracture of cervical spine with spinal cord lesion
S111000	Opn spinal fracture with unspec cervical cord lesion, C1-4
S111100	Opn spinal fracture with complete cervcl cord lesion, C1-4
S111200	Opn spinal fracture with anterior cervcl cord lesion, C1-4
S111300	Open spinal fracture with central cervical cord lesion, C1-4
S111400	Opn spinal fracture with posterior cervcl cord lesion, C1-4
S111600	Opn spinal fracture with unspec cervical cord lesion, C5-7
S111700	Opn spinal fracture with complete cervcl cord lesion, C5-7
S111800	Opn spinal fracture with anterior cervcl cord lesion, C5-7
S111900	Open spinal fracture with central cervical cord lesion, C5-7
S111A00	Opn spinal fracture with posterior cervcl cord lesion, C5-7
S111z00	Open fracture of cervical spine with spinal cord lesion NOS
S112.00	Closed fracture of thoracic spine with spinal cord lesion
S112000	Cls spinal fracture with unspec thoracic cord lesion,T1-6
S112100	Cls spinal fracture wth complete thoracic cord lesion,T1-6
S112200	Cls spinal fracture wth anterior thoracic cord lesion,T1-6
S112300	Cls spinal fracture with central thoracic cord lesion, T1-6
S112400	Cls spinal fracture with posterior thorac cord lesion, T1-6
S112600	Cls spinal fracture with unspec thoracic cord lesion, T7-12
S112700	Cls spinal fracture with complete thorac cord lesion, T7-12
S112800	Cls spinal fracture with anterior thorac cord lesion, T7-12
S112900	Cls spinal fracture with central thoracid cord lesion, T7-12
S112A00	Cls spinal fracture with posterior thorac cord lesion, T7-12
S112z00	Closed fracture of thoracic spine with cord lesion NOS
S113.00	Open fracture of thoracic spine with spinal cord lesion
S113000	Opn spinal fracture with unspec thoracic cord lesion, T1-6
S113100	Opn spinal fracture with complete thorac cord lesion, T1-6
S113200	Opn spinal fracture with anterior thorac cord lesion, T1-6
S113300	Open spinal fracture with central thoracic cord lesion, T1-6
S113400	Opn spinal fracture with posterior thorac cord lesion, T1-6
S113600	Opn spinal fracture with unspec thoracic cord lesion, T7-12
S113700	Opn spinal fracture with complete thorac cord lesion, T7-12
S113800	Opn spinal fracture with anterior thorac cord lesion, T7-12
S113900	Op spinal fracture with central thoracic cord lesion, T7-12
S113A00	Opn spinal fracture with posterior thorac cord lesion, T7-12
S113z00	Open fracture of thoracic spine with spinal cord lesion NOS
S114.00	Closed fracture of lumbar spine with spinal cord lesion
S114000	Closed spinal fracture with unspecified lumbar cord lesion
S114100	Closed spinal fracture with complete lumbar cord lesion
S114200	Closed spinal fracture with anterior lumbar cord lesion
S114300	Closed spinal fracture with central lumbar cord lesion
S114400	Closed spinal fracture with posterior lumbar cord lesion
S114500	Closed spinal fracture with cauda equina lesion
S115.00	Open fracture of lumbar spine with spinal cord lesion
S115000	Open spinal fracture with unspecified lumbar cord lesion
S115100	Open spinal fracture with complete lumbar cord lesion
S115200	Open spinal fracture with anterior lumbar cord lesion
S115300	Open spinal fracture with central lumbar cord lesion
S115400	Open spinal fracture with posterior lumbar cord lesion
S115500	Open spinal fracture with cauda equina lesion
S115z00	Open spinal fracture with incomplete lumbar cord lesion NOS
S116.00	Closed fracture of sacrum with spinal cord lesion
S116000	Closed fracture of sacrum with unspec spinal cord lesion
S116100	Closed fracture of sacrum with complete cauda equina lesion
S116200	Closed fracture of sacrum with other cauda equina injury
S116300	Closed fracture of sacrum with other spinal cord injury
S116z00	Closed fracture of sacrum with spinal cord lesion NOS
S117.00	Open fracture of sacrum with spinal cord lesion
S117000	Open fracture of sacrum with unspecified spinal cord lesion
S117100	Open fracture of sacrum with complete cauda equina lesion
S117200	Open fracture of sacrum with other cauda equina injury
S117300	Open fracture of sacrum with other spinal cord injury
S117z00	Open fracture of sacrum with spinal cord lesion NOS
S118.00	Closed fracture of coccyx with spinal cord lesion
S118000	Closed fracture of coccyx with unspec spinal cord lesion
S118100	Closed fracture of coccyx with complete cauda equina lesion
S118200	Closed fracture of coccyx with other cauda equina injury
S118300	Closed fracture of coccyx with other spinal cord injury
S118z00	Closed fracture of coccyx with spinal cord lesion NOS
S119.00	Open fracture of coccyx with spinal cord lesion
S119000	Open fracture of coccyx with unspecified spinal cord lesion
S119100	Open fracture of coccyx with complete cauda equina lesion
S119200	Open fracture of coccyx with other cauda equina injury
S119300	Open fracture of coccyx with other spinal cord injury
S119z00	Open fracture of coccyx with spinal cord lesion NOS
S11x.00	Closed fracture of spine with spinal cord lesion unspecified
S11y.00	Open fracture of spine with spinal cord lesion unspecified
S11z.00	Fracture of spine with spinal cord lesion NOS
S12..00	Fracture of rib(s), sternum, larynx and trachea
S120.00	Closed fracture rib
S120000	Closed fracture of rib, unspecified
S120100	Closed fracture of one rib
S120200	Closed fracture of two ribs
S120300	Closed fracture of three ribs
S120400	Closed fracture of four ribs
S120500	Closed fracture of five ribs
S120600	Closed fracture of six ribs
S120700	Closed fracture of seven ribs
S120800	Closed fracture of eight or more ribs
S120900	Closed fracture multiple ribs
S120A00	Cough fracture
S120z00	Closed fracture of rib(s) NOS
S121.00	Open fracture rib
S121000	Open fracture of rib, unspecified
S121100	Open fracture of one rib
S121200	Open fracture of two ribs
S121300	Open fracture of three ribs
S121400	Open fracture of four ribs
S121500	Open fracture of five ribs
S121600	Open fracture of six ribs
S121700	Open fracture of seven ribs
S121800	Open fracture of eight or more ribs
S121900	Open fracture multiple ribs
S121z00	Open fracture of rib(s) NOS
S122.00	Closed fracture sternum
S123.00	Open fracture sternum
S125.00	Closed fracture larynx and trachea
S125000	Closed fracture larynx
S125100	Closed fracture of hyoid bone
S125200	Closed fracture of thyroid cartilage
S125300	Closed fracture of trachea
S125z00	Closed fracture of larynx and trachea NOS
S126.00	Open fracture larynx and trachea
S126000	Open fracture larynx
S126100	Open fracture of hyoid bone
S126200	Open fracture of thyroid cartilage
S126300	Open fracture of trachea
S126z00	Open fracture of larynx and trachea NOS
S127.00	Fracture of rib
S127000	Multiple fractures of ribs
S127100	Cough fracture of ribs
S128.00	Fracture of sternum
S12X.00	Fracture of bony thorax, part unspecified
S12X000	Closed fracture of bony thorax part unspecified
S12X100	Open fracture of bony thorax part unspecified
S12y.00	Fracture of other parts of bony thorax
S12y000	Closed fracture of other parts of bony thorax
S12y100	Open fracture of other parts of bony thorax
S12z.00	Fracture of rib(s), sternum, larynx or trachea NOS
S12z.11	Rib fracture NOS
S12z.12	Sternum fracture NOS
S13..00	Fracture or disruption of pelvis
S130.00	Closed fracture acetabulum
S130000	Closed fracture acetabulum, anterior lip alone
S130100	Closed fracture acetabulum, posterior lip alone
S130200	Closed fracture acetabulum, anterior column
S130300	Closed fracture acetabulum, posterior column
S130400	Closed fracture acetabulum, floor
S130500	Closed fracture acetabulum, double column transverse
S130600	Closed fracture acetabulum, double column unspecified
S130y00	Other specified closed fracture acetabulum
S130z00	Closed fracture acetabulum NOS
S131.00	Open fracture acetabulum
S131000	Open fracture acetabulum, anterior lip alone
S131100	Open fracture acetabulum, posterior lip alone
S131200	Open fracture acetabulum, anterior column
S131300	Open fracture acetabulum, posterior column
S131400	Open fracture acetabulum, floor
S131500	Open fracture acetabulum, double column transverse
S131600	Open fracture acetabulum, double column unspecified
S131y00	Other specified open fracture acetabulum
S131z00	Open fracture acetabulum NOS
S132.00	Closed fracture pubis
S132000	Closed fracture pelvis, single pubic ramus
S132100	Closed fracture pelvis, multiple pubic rami - stable
S132200	Closed fracture pelvis, multiple pubic rami - unstable
S132y00	Other specified closed fracture pubis
S132z00	Closed fracture pubis NOS
S133.00	Open fracture of pubis
S133000	Open fracture pelvis, single pubic ramus
S133100	Open fracture pelvis, multiple pubic rami - stable
S133200	Open fracture pelvis, multiple pubic rami - unstable
S133y00	Other specified open fracture of pubis
S133z00	Open fracture of pubis NOS
S134.00	Other or multiple closed fracture of pelvis
S134000	Closed fracture of ilium, unspecified
S134100	Closed fracture pelvis, ischium
S134300	Closed fracture pelvis, ischial tuberosity
S134400	Closed fracture pelvis, anterior superior iliac spine
S134500	Closed fracture pelvis, anterior inferior iliac spine
S134600	Closed fracture pelvis, iliac wing
S134700	Closed vertical fracture of ilium
S134800	Closed fracture dislocation of sacro-iliac joint
S134z00	Other or multiple closed fracture of pelvis NOS
S135.00	Other or multiple open fracture of pelvis
S135000	Open fracture of ilium, unspecified
S135100	Open fracture pelvis, ischium
S135300	Open fracture pelvis, ischial tuberosity
S135400	Open fracture pelvis, anterior superior iliac spine
S135500	Open fracture pelvis, anterior inferior iliac spine
S135600	Open fracture pelvis, iliac wing
S135700	Open vertical fracture of ilium
S135800	Open fracture dislocation of sacro-iliac joint
S135y00	Other open fracture of pelvis
S135z00	Other/multiple open fracture of pelvis NOS
S13y.00	Closed fracture of pelvis NOS
S13z.00	Open fracture of pelvis NOS
S14..00	Fracture of ill-defined bones of trunk
S140.00	Closed fracture of ill-defined bone of trunk
S141.00	Open fracture of ill-defined bone of trunk
S14z.00	Fracture of ill-defined bone of trunk NOS
S15..00	Fracture of thoracic vertebra
S150.00	Multiple fractures of thoracic spine
S150000	Closed multiple fractures of thoracic spine
S150100	Open multiple fracture of thoracic spine
S1z..00	Fracture of neck and trunk NOS
S2...00	Fracture of upper limb
S2...11	Arm fracture
S20..00	Fracture of clavicle
S20..11	Collar bone fracture
S200.00	Closed fracture of clavicle
S200000	Closed fracture of clavicle, unspecified part
S200100	Closed fracture clavicle, medial end
S200200	Closed fracture clavicle, shaft
S200300	Closed fracture clavicle, lateral end
S200z00	Closed fracture of clavicle NOS
S201.00	Open fracture of clavicle
S201000	Open fracture of clavicle, unspecified part
S201100	Open fracture clavicle, medial end
S201200	Open fracture clavicle, shaft
S201300	Open fracture clavicle, lateral end
S201z00	Open fracture of clavicle NOS
S20z.00	Fracture of clavicle NOS
S21..00	Fracture of scapula
S21..11	Shoulder blade fracture
S210.00	Closed fracture of scapula
S210000	Closed fracture of scapula, unspecified part
S210100	Closed fracture scapula, acromion
S210200	Closed fracture scapula, coracoid
S210300	Closed fracture scapula, glenoid
S210400	Closed fracture scapula, blade
S210500	Closed fracture scapula, spine
S210600	Closed fracture scapula, neck
S210z00	Closed fracture of scapula NOS
S211.00	Open fracture of scapula
S211000	Open fracture of scapula, unspecified part
S211100	Open fracture scapula, acromion
S211200	Open fracture scapula, coracoid
S211300	Open fracture scapula, glenoid
S211400	Open fracture scapula, blade
S211500	Open fracture scapula, spine
S211600	Open fracture scapula, neck
S211z00	Open fracture of scapula NOS
S21z.00	Fracture of scapula NOS
S22..00	Fracture of humerus
S220.00	Closed fracture of the proximal humerus
S220000	Closed fracture of proximal humerus, unspecified part
S220100	Closed fracture proximal humerus, neck
S220200	Closed fracture of proximal humerus, anatomical neck
S220300	Closed fracture proximal humerus, greater tuberosity
S220400	Closed fracture proximal humerus, head
S220500	Closed fracture of humerus, upper epiphysis
S220600	Closed fracture proximal humerus, three part
S220700	Closed fracture proximal humerus, four part
S220z00	Closed fracture of proximal humerus not otherwise specified
S221.00	Open fracture of the proximal humerus
S221.11	Shoulder fracture - open
S221000	Open fracture of proximal humerus, unspecified part
S221100	Open fracture proximal humerus, neck
S221200	Open fracture of proximal humerus, anatomical neck
S221300	Open fracture proximal humerus, greater tuberosity
S221400	Open fracture proximal humerus, head
S221500	Open fracture of humerus, upper epiphysis
S221600	Open fracture proximal humerus, three part
S221700	Open fracture proximal humerus, four part
S221z00	Open fracture of proximal humerus not otherwise specified
S222.00	Closed fracture of humerus, shaft or unspecified part
S222000	Closed fracture of humerus NOS
S222100	Closed fracture of humerus, shaft
S222z00	Closed fracture of humerus, shaft or unspecified part NOS
S223.00	Open fracture of humerus, shaft or unspecified part
S223000	Open fracture of humerus NOS
S223100	Open fracture of humerus, shaft
S223z00	Open fracture of humerus, shaft or unspecified part NOS
S224.00	Closed fracture of the distal humerus
S224.11	Elbow fracture - closed
S224000	Closed fracture of elbow, unspecified part
S224100	Closed fracture distal humerus, supracondylar
S224200	Closed fracture distal humerus, lateral condyle
S224300	Closed fracture distal humerus, medial condyle
S224400	Closed fracture of distal humerus, condyle(s) unspecified
S224500	Closed fracture of distal humerus, trochlea
S224600	Closed fracture distal humerus, lateral epicondyle
S224700	Closed fracture distal humerus, medial epicondyle
S224800	Closed fracture distal humerus, capitellum
S224900	Closed fracture distal humerus, bicondylar (T-Y fracture)
S224x00	Closed fracture of distal humerus, multiple
S224z00	Closed fracture of distal humerus, not otherwise specified
S225.00	Open fracture of the distal humerus
S225.11	Elbow fracture - open
S225000	Open fracture of elbow, unspecified part
S225100	Open fracture distal humerus, supracondylar
S225200	Open fracture distal humerus, lateral condyle
S225300	Open fracture distal humerus, medial condyle
S225400	Open fracture of distal humerus, condyle(s) unspecified
S225500	Open fracture of distal humerus, trochlea
S225600	Open fracture distal humerus, lateral epicondyle
S225700	Open fracture distal humerus, medial epicondyle
S225800	Open fracture distal humerus, capitellum
S225900	Open fracture distal humerus, bicondylar (T-Y fracture)
S225x00	Open fracture of distal humerus, multiple
S225z00	Open fracture of distal humerus, not otherwise specified
S226.00	Fracture of upper end of humerus
S227.00	Fracture of shaft of humerus
S228.00	Fracture of lower end of humerus
S22z.00	Fracture of humerus NOS
S23..00	Fracture of radius and ulna
S23..11	Forearm fracture
S230.00	Closed fracture of proximal radius and ulna
S230000	Closed fracture of proximal forearm, unspecified part
S230100	Closed fracture olecranon, extra-articular
S230200	Closed fracture of ulna, coronoid
S230300	Closed Monteggia's fracture
S230400	Closed fracture of proximal ulna, comminuted
S230500	Closed fracture of the proximal ulna
S230600	Closed fracture radius, head
S230700	Closed fracture radius, neck
S230800	Closed fracture proximal radius, comminuted
S230900	Closed fracture of the proximal radius
S230A00	Closed fracture radius and ulna, proximal
S230B00	Closed fracture olecranon, intra-articular
S230z00	Closed fracture of proximal forearm not otherwise specified
S231.00	Open fracture of proximal radius and ulna
S231000	Open fracture of proximal forearm, unspecified
S231100	Open fracture olecranon, extra-articular
S231200	Open fracture of ulna, coronoid
S231300	Open Monteggia's fracture
S231400	Open fracture proximal ulna, comminuted
S231500	Open fracture of the proximal ulna
S231600	Open fracture radial head
S231700	Open fracture radial neck
S231800	Open fracture proximal radius, comminuted
S231900	Open fracture of the proximal radius
S231A00	Open fracture radius and ulna, proximal
S231B00	Open fracture olecranon, intra-articular
S231z00	Open fracture of forearm, upper end, NOS
S232.00	Closed fracture of radius and ulna, shaft
S232000	Closed fracture of radius, shaft, unspecified
S232100	Closed fracture of the radial shaft
S232200	Closed fracture of the ulnar shaft
S232300	Closed fracture radius and ulna, middle
S232z00	Closed fracture of radius and ulna, shaft, NOS
S233.00	Open fracture of radius and ulna, shaft
S233000	Open fracture of radius, shaft, unspecified
S233100	Open fracture of the radial shaft
S233200	Open fracture of the ulnar shaft
S233300	Open fracture radius and ulna, middle
S233z00	Open fracture of radius and ulna, shaft, NOS
S234.00	Closed fracture of radius and ulna, lower end
S234.11	Wrist fracture - closed
S234000	Closed fracture of forearm, lower end, unspecified
S234100	Closed Colles' fracture
S234111	Smith's fracture - closed
S234200	Closed fracture of the distal radius, unspecified
S234211	Dupuytren's fracture, radius - closed
S234300	Closed fracture of ulna, styloid process
S234400	Closed fracture of ulna, lower epiphysis
S234500	Closed fracture distal ulna, unspecified
S234600	Closed fracture radius and ulna, distal
S234700	Closed Smith's fracture
S234800	Closed Galeazzi fracture
S234900	Closed volar Barton's fracture
S234911	Closed volar Barton's fracture-dislocation
S234912	Closed volar Barton fracture-subluxation
S234A00	Closd dorsal Barton's fracture
S234A11	Closed dorsal Barton's fracture-dislocation
S234A12	Closed dorsal Barton fracture-subluxation
S234B00	Closed fracture radial styloid
S234C00	Closed fracture distal radius, intra-articular, die-punch
S234D00	Closed fracture distal radius, extra-articular, other type
S234E00	Closed fracture distal radius, intra-articular, other type
S234F00	Closed Barton's fracture
S234G00	Greenstick fracture of distal radius
S234z00	Closed fracture of forearm, lower end, NOS
S235.00	Open fracture of radius and ulna, lower end
S235.11	Wrist fracture - open
S235000	Open fracture of forearm, lower end, unspecified
S235100	Open Colles' fracture
S235111	Smith's fracture - open
S235200	Open fracture of the distal radius, unspecified
S235211	Dupuytren's fracture, radius - open
S235300	Open fracture of ulna, styloid process
S235400	Open fracture of ulna, lower epiphysis
S235500	Open fracture distal ulna - other
S235600	Open fracture radius and ulna, distal
S235700	Open Smith's fracture
S235800	Open Galeazzi fracture
S235900	Open volar Barton's fracture
S235911	Open volar Barton fracture-dislocation
S235912	Open volar Barton fracture-subluxation
S235A00	Open dorsal Barton's fracture
S235A11	Open dorsal Barton's fracture-dislocation
S235A12	Open dorsal Barton's fracture-subluxation
S235B00	Open fracture radial styloid
S235C00	Open fracture distal radius, intra-articular, die-punch
S235D00	Open fracture distal radius, extra-articular other type
S235E00	Open fracture distal radius, intra-articular other type
S235F00	Open Barton's fracture
S235z00	Open fracture of forearm, lower end, NOS
S236.00	Fracture of upper end of ulna
S237.00	Fracture of upper end of radius
S238.00	Fracture of shaft of ulna
S239.00	Fracture of shaft of radius
S23A.00	Fracture of shafts of both ulna and radius
S23B.00	Fracture of lower end of radius
S23C.00	Fracture of lower end of both ulna and radius
S23x.00	Closed fracture of radius and ulna, unspecified part
S23x000	Closed fracture of forearm, unspecified
S23x100	Closed fracture of radius (alone), unspecified
S23x111	Fracture of radius NOS
S23x200	Closed fracture of ulna (alone), unspecified
S23x211	Fracture of ulna NOS
S23x300	Closed fracture of the radius and ulna
S23xz00	Closed fracture of radius and ulna, NOS
S23y.00	Open fracture of radius and ulna, unspecified part
S23y000	Open fracture of forearm, unspecified
S23y100	Open fracture of radius (alone), unspecified
S23y200	Open fracture of ulna (alone), unspecified
S23y300	Open fracture of the radius and ulna
S23yz00	Open fracture of radius and ulna, NOS
S23z.00	Fracture of radius and ulna, NOS
S24..00	Fracture of carpal bone
S24..11	Hand fracture - carpal bone
S240.00	Closed fracture of carpal bone
S240000	Closed fracture of carpal bone, unspecified
S240100	Closed fracture of the scaphoid
S240200	Closed fracture lunate
S240300	Closed fracture triquetral
S240400	Closed fracture pisiform
S240500	Closed fracture trapezium
S240600	Closed fracture trapezoid
S240700	Closed fracture capitate
S240800	Closed fracture hamate
S240900	Closed fracture hamate, hook
S240A00	Closed fracture scaphoid, proximal pole
S240B00	Closed fracture scaphoid, waist, transverse
S240C00	Closed fracture scaphoid, waist, oblique
S240D00	Closed fracture scaphoid, waist, comminuted
S240E00	Closed fracture scaphoid, tuberosity
S240F00	Closed fracture carpal bones, multiple
S240y00	Closed fracture of other carpal bone
S240z00	Closed fracture of carpal bone NOS
S241.00	Open fracture of carpal bone
S241000	Open fracture of carpal bone, unspecified
S241100	Open fracture of the scaphoid
S241200	Open fracture lunate
S241300	Open fracture triquetral
S241400	Open fracture pisiform
S241500	Open fracture trapezium
S241600	Open fracture trapezoid
S241700	Open fracture capitate
S241800	Open fracture hamate
S241900	Open fracture hamate, hook
S241A00	Open fracture scaphoid, proximal pole
S241B00	Open fracture scaphoid, waist, transverse
S241C00	Open fracture scaphoid, waist, oblique
S241D00	Open fracture scaphoid, waist, comminuted
S241E00	Open fracture scaphoid, tuberosity
S241F00	Open fracture carpal bones, multiple
S241y00	Open fracture of other carpal bone
S241z00	Open fracture of carpal bone NOS
S242.00	Fracture at wrist and hand level
S242000	Fracture of scaphoid
S242100	Fracture of first metacarpal bone
S242200	Fracture of other metacarpal bone
S242300	Multiple fractures of metacarpal bones
S24z.00	Fracture of carpal bone NOS
S25..00	Fracture of metacarpal bone
S25..11	Hand fracture - metacarpal bone
S250.00	Closed fracture of metacarpal bone(s)
S250000	Closed fracture of metacarpal bone (s), site unspecified
S250200	Closed fracture finger metacarpal base
S250300	Closed fracture finger metacarpal shaft
S250400	Closed fracture finger metacarpal neck
S250500	Closed fracture finger metacarpal head
S250600	Closed fracture finger metacarpal
S250700	Closed fracture finger metacarpal, multiple
S250800	Closed fracture of thumb metacarpal
S250A00	Closed fracture thumb metacarpal shaft
S250B00	Closed fracture thumb metacarpal neck
S250C00	Closed fracture thumb metacarpal head
S250x00	Closed fractures of multiple sites of unspecified metacarpus
S250z00	Closed fracture of metacarpal bone(s) NOS
S251.00	Open fracture of metacarpal bone(s)
S251000	Open fracture of metacarpal bone(s), site unspecified
S251200	Open fracture finger metacarpal base
S251300	Open fracture finger metacarpal shaft
S251400	Open fracture finger metacarpal neck
S251500	Open fracture finger metacarpal head
S251600	Open fracture finger metacarpal
S251700	Open fracture finger metacarpal, multiple
S251800	Open fracture of thumb metacarpal
S251A00	Open fracture thumb metacarpal shaft
S251B00	Open fracture thumb metacarpal neck
S251C00	Open fracture thumb metacarpal head
S251x00	Open fractures of multiple sites of unspecified metacarpus
S251z00	Open fracture of metacarpal bone(s) NOS
S252.00	Closed fracture sesamoid bone of hand
S253.00	Open fracture sesamoid bone of hand
S26..00	Fracture of one or more phalanges of hand
S26..11	Finger fracture
S26..12	Thumb fracture excluding base
S260.00	Closed fracture of one or more phalanges of hand
S260000	Closed fracture of phalanx or phalanges, unspecified
S260300	Closed fracture thumb proximal phalanx
S260400	Closed fracture thumb proximal phalanx, base
S260500	Closed fracture thumb proximal phalanx, shaft
S260600	Closed fracture thumb proximal phalanx, neck
S260700	Closed fracture thumb proximal phalanx, head
S260800	Closed fracture thumb distal phalanx
S260900	Closed fracture thumb distal phalanx, base
S260A00	Closed fracture thumb distal phalanx, shaft
S260B00	Closed fracture thumb distal phalanx, tuft
S260C00	Closed fracture thumb distal phalanx, mallet
S260D00	Closed fracture finger proximal phalanx
S260E00	Closed fracture finger proximal phalanx, base
S260F00	Closed fracture finger proximal phalanx, shaft
S260G00	Closed fracture finger proximal phalanx, neck
S260H00	Closed fracture finger proximal phalanx, head
S260J00	Closed fracture finger proximal phalanx, multiple
S260K00	Closed fracture finger middle phalanx
S260L00	Closed fracture finger middle phalanx, base
S260M00	Closed fracture finger middle phalanx, shaft
S260N00	Closed fracture finger middle phalanx, neck
S260P00	Closed fracture finger middle phalanx, head
S260Q00	Closed fracture finger middle phalanx, multiple
S260R00	Closed fracture finger distal phalanx
S260S00	Closed fracture finger distal phalanx, base
S260T00	Closed fracture finger distal phalanx, shaft
S260U00	Closed fracture finger distal phalanx, tuft
S260V00	Closed fracture finger distal phalanx, mallet
S260W00	Closed fracture finger distal phalanx, multiple
S260x00	Closed fractures of phalanx or phalanges, multiple sites
S260z00	Closed fracture of one or more phalanges of hand NOS
S261.00	Open fracture of one or more phalanges of hand
S261000	Open fracture of phalanx or phalanges, unspecified
S261300	Open fracture thumb proximal phalanx
S261400	Open fracture thumb proximal phalanx, base
S261500	Open fracture thumb proximal phalanx, shaft
S261600	Open fracture thumb proximal phalanx, neck
S261700	Open fracture thumb proximal phalanx, head
S261800	Open fracture thumb distal phalanx
S261900	Open fracture thumb distal phalanx, base
S261A00	Open fracture thumb distal phalanx, shaft
S261B00	Open fracture thumb distal phalanx, tuft
S261C00	Open fracture thumb distal phalanx, mallet
S261D00	Open fracture finger proximal phalanx
S261E00	Open fracture finger proximal phalanx, base
S261F00	Open fracture finger proximal phalanx, shaft
S261G00	Open fracture finger proximal phalanx, neck
S261H00	Open fracture finger proximal phalanx, head
S261J00	Open fracture finger proximal phalanx, multiple
S261K00	Open fracture finger middle phalanx
S261L00	Open fracture finger middle phalanx, base
S261M00	Open fracture finger middle phalanx, shaft
S261N00	Open fracture finger middle phalanx, neck
S261P00	Open fracture finger middle phalanx, head
S261Q00	Open fracture finger middle phalanx, multiple
S261R00	Open fracture finger distal phalanx
S261S00	Open fracture finger distal phalanx, base
S261T00	Open fracture finger distal phalanx, shaft
S261U00	Open fracture finger distal phalanx, tuft
S261V00	Open fracture finger distal phalanx, mallet
S261W00	Open fracture finger distal phalanx, multiple
S261x00	Open fracture of phalanx or phalanges, multiple sites
S261z00	Open fracture of one or more phalanges of hand NOS
S262.00	Fracture of thumb
S263.00	Fracture of other finger
S264.00	Multiple fractures of fingers
S26z.00	Fracture of one or more phalanges of hand NOS
S27..00	Multiple fractures of hand bones
S270.00	Closed multiple fractures of hand bones
S271.00	Open multiple fractures of hand bones
S27z.00	Multiple fractures of hand bones NOS
S28..00	Ill-defined fractures of upper limb
S28..11	Ill-defined fracture of arm
S280.00	Closed ill-defined fractures of upper limb
S281.00	Open ill-defined fractures of upper limb
S28z.00	Ill-defined fractures of upper limb NOS
S29..11	Multiple fractures of arm
S29..12	Multiple rib fractures
S29..13	Multiple fractures of sternum
S292.00	Multiple fractures of clavicle, scapula and humerus
S292000	Closed multiple fractures of clavicle, scapula and humerus
S292100	Open multiple fractures of clavicle, scapula and humerus
S293.00	Multiple fractures of forearm
S294.00	Fractures involving multiple regions of both upper limbs
S294000	Cl fractures involving multiple regions of both upper limbs
S294100	Op fractures involving multiple regions of both upper limbs
S2A..00	Fracture of upper limb, level unspecified
S2B..00	Fracture of bone of hand
S2z..00	Fracture of upper limb NOS
S3...00	Fracture of lower limb
S3...11	Leg fracture
S30..00	Fracture of neck of femur
S30..11	Hip fracture
S300.00	Closed fracture proximal femur, transcervical
S300100	Closed fracture proximal femur, transepiphyseal
S300200	Closed fracture proximal femur, midcervical section
S300300	Closed fracture proximal femur, basicervical
S300311	Closed fracture, base of neck of femur
S300400	Closed fracture head of femur
S300600	Closed fracture proximal femur, subcapital, Garden grade I
S300700	Closed fracture proximal femur, subcapital, Garden grade II
S300800	Closed fracture proximal femur, subcapital, Garden grade III
S300900	Closed fracture proximal femur, subcapital, Garden grade IV
S300A00	Closed fracture of femur, upper epiphysis
S300y00	Closed fracture proximal femur, other transcervical
S300y11	Closed fracture of femur, subcapital
S300z00	Closed fracture proximal femur, transcervical, NOS
S301.00	Open fracture proximal femur, transcervical
S301100	Open fracture proximal femur, transepiphyseal
S301200	Open fracture proximal femur, midcervical section
S301300	Open fracture proximal femur, basicervical
S301311	Open fracture base of neck of femur
S301400	Open fracture head, femur
S301500	Open fracture proximal femur,subcapital, Garden grade unspec
S301600	Open fracture proximal femur,subcapital, Garden grade I
S301700	Open fracture proximal femur,subcapital, Garden grade II
S301800	Open fracture proximal femur,subcapital, Garden grade III
S301900	Open fracture proximal femur,subcapital, Garden grade IV
S301A00	Open fracture of femur, upper epiphysis
S301y00	Open fracture proximal femur, other transcervical
S301y11	Open fracture of femur, subcapital
S301z00	Open fracture proximal femur, transcervical, NOS
S302.00	Closed fracture of proximal femur, pertrochanteric
S302011	Closed fracture of femur, greater trochanter
S302012	Closed fracture of femur, lesser trochanter
S302100	Closed fracture proximal femur, intertrochanteric, two part
S302200	Closed fracture proximal femur, subtrochanteric
S302400	Closed fracture of femur, intertrochanteric
S303.00	Open fracture of proximal femur, pertrochanteric
S303011	Open fracture of femur, greater trochanter
S303012	Open fracture of femur, lesser trochanter
S303100	Open fracture proximal femur, intertrochanteric, two part
S303200	Open fracture proximal femur, subtrochanteric
S303300	Open fracture proximal femur, intertrochanteric, comminuted
S303400	Open fracture of femur, intertrochanteric
S303z00	Open fracture of proximal femur, pertrochanteric, NOS
S304.00	Pertrochanteric fracture
S305.00	Subtrochanteric fracture
S30w.00	Closed fracture of unspecified proximal femur
S30x.00	Open fracture of unspecified proximal femur
S30y.00	Closed fracture of neck of femur NOS
S30y.11	Hip fracture NOS
S30z.00	Open fracture of neck of femur NOS
S31..00	Other fracture of femur
S310.00	Closed fracture of femur, shaft or unspecified part
S310000	Closed fracture of femur, unspecified part
S310011	Thigh fracture NOS
S310012	Upper leg fracture NOS
S310100	Closed fracture shaft of femur
S310z00	Closed fracture of shaft or unspecified part, NOS
S311.00	Open fracture of femur, shaft or unspecified part
S311000	Open fracture of femur, unspecified part
S311100	Open fracture shaft of femur
S311z00	Open fracture of femur, shaft or unspecified part, NOS
S312.00	Closed fracture distal femur
S312.11	Closed fracture of femur, distal end
S312000	Closed fracture of distal femur, unspecified
S312100	Closed fracture of femoral condyle, unspecified
S312200	Closed fracture of femur, lower epiphysis
S312300	Closed fracture distal femur, supracondylar
S312400	Closed fracture distal femur, medial condyle
S312500	Closed fracture distal femur, lateral condyle
S312600	Closed fracture distal femur, bicondylar (T-Y fracture)
S312x00	Closed fracture distal femur, comminuted/intra-articular
S312z00	Closed fracture of distal femur not otherwise specified
S313.00	Open fracture distal femur
S313.11	Open fracture of femur, distal end
S313000	Open fracture distal femur, unspecified
S313100	Open fracture of femoral condyle, unspecified
S313200	Open fracture of femur, lower epiphysis
S313300	Open fracture distal femur, supracondylar
S313400	Open fracture distal femur, medial condyle
S313500	Open fracture distal femur, lateral condyle
S313600	Open fracture distal femur, bicondylar (T-Y fracture)
S313x00	Open fracture distal femur, comminuted/intra-articular
S313z00	Open fracture of distal femur not otherwise specified
S314.00	Fracture of shaft of femur
S315.00	Fracture of lower end of femur
S31z.00	Fracture of femur, NOS
S32..00	Fracture of patella
S320.00	Closed fracture of the patella
S320000	Closed fracture patella, transverse
S320100	Closed fracture patella, proximal pole
S320200	Closed fracture patella, distal pole
S320300	Closed fracture patella, vertical
S320400	Closed fracture patella, comminuted (stellate)
S321.00	Open fracture of the patella
S321000	Open fracture patella, transverse
S321100	Open fracture patella, proximal pole
S321200	Open fracture patella, distal pole
S321300	Open fracture patella, vertical
S321400	Open fracture patella, comminuted (stellate)
S32z.00	Fracture of patella, NOS
S33..00	Fracture of tibia and fibula
S330.00	Closed fracture of tibia and fibula, proximal
S330000	Closed fracture of the proximal tibia
S330011	Closed fracture of tibial condyles
S330012	Closed fracture of tibial tuberosity
S330100	Closed fracture proximal fibula
S330200	Closed fracture of tibia and fibula, proximal
S330300	Closed fracture proximal tibia, medial condyle (plateau)
S330400	Closed fracture proximal tibia, lateral condyle (plateau)
S330500	Closed fracture proximal tibia, bicondylar
S330600	Closed fracture spine, tibia
S330700	Closed fracture tubercle, tibia
S330800	Closed fracture fibula, head
S330900	Closed fracture fibula, neck
S330z00	Closed fracture of tibia and fibula, proximal NOS
S331.00	Open fracture of tibia and fibula, proximal
S331000	Open fracture of the proximal tibia
S331011	Open fracture of tibial condyles
S331012	Open fracture of tibial tuberosity
S331100	Open fracture proximal fibula
S331200	Open fracture of tibia and fibula, proximal
S331300	Open fracture proximal tibia, medial condyle (plateau)
S331400	Open fracture proximal tibia, lateral condyle (plateau)
S331500	Open fracture proximal tibia, bicondylar
S331600	Open fracture spine, tibia
S331700	Open fracture tubercle, tibia
S331800	Open fracture fibula, head
S331900	Open fracture fibula, neck
S331A00	Open fracture tibial plateau
S331z00	Open fracture of tibia and fibula, proximal NOS
S332.00	Closed fracture of tibia/fibula, shaft
S332000	Closed fracture shaft of tibia
S332100	Closed fracture shaft of fibula
S332200	Closed fracture of tibia and fibula, shaft
S332z00	Closed fracture of tibia and fibula, shaft, NOS
S333.00	Open fracture of tibia/fibula, shaft
S333000	Open fracture shaft of tibia
S333100	Open fracture shaft of fibula
S333200	Open fracture of tibia and fibula, shaft
S333z00	Open fracture of tibia and fibula, shaft, NOS
S334.00	Closed fracture distal tibia
S334000	Closed fracture distal tibia, extra-articular
S334100	Closed fracture distal tibia, intra-articular
S335.00	Open fracture distal tibia
S335000	Open fracture distal tibia, extra-articular
S335100	Open fracture distal tibia, intra-articular
S336.00	Fracture of upper end of tibia
S336000	Fracture tibial plateau
S337.00	Fracture of shaft of tibia
S338.00	Fracture of lower end of tibia
S339.00	Fracture of fibula alone
S339000	Closed fracture of distal fibula
S339100	Open fracture of distal fibula
S33A.00	Fracture of tibia
S33B.00	Open fracture of distal tibia and fibula
S33C.00	Closed fracture of distal tibia and fibula
S33x.00	Closed fracture of tibia and fibula, unspecified part, NOS
S33x.11	Lower leg fracture NOS
S33x000	Closed fracture of tibia, unspecified part, NOS
S33x100	Closed fracture of fibula, unspecified part, NOS
S33x200	Closed fracture of tibia and fibula, unspecified part
S33xz00	Closed fracture of tibia and fibula, unspecified part, NOS
S33y.00	Open fracture of tibia and fibula, unspecified part, NOS
S33y000	Open fracture of tibia, unspecified part, NOS
S33y100	Open fracture of fibula, unspecified part, NOS
S33y200	Open fracture of tibia and fibula, unspecified part
S33yz00	Open fracture of tibia and fibula, unspecified part, NOS
S33z.00	Fracture of tibia and fibula, NOS
S34..00	Fracture of ankle
S340.00	Closed fracture ankle, medial malleolus
S341.00	Open fracture ankle, medial malleolus
S342.00	Closed fracture ankle, lateral malleolus
S342000	Closed fracture ankle, lateral malleolus, low
S342100	Closed fracture ankle, lateral malleolus, high
S343.00	Open fracture ankle, lateral malleolus
S343000	Open fracture ankle, lateral malleolus, low
S343100	Open fracture ankle, lateral malleolus, high
S344.00	Closed fracture ankle, bimalleolar
S344.11	Dupuytren's fracture, fibula
S344.12	Pott's fracture - ankle
S344000	Closed fracture ankle, bimalleolar, low fibular fracture
S344100	Closed fracture ankle, bimalleolar, high fibular fracture
S345.00	Open fracture ankle, bimalleolar
S345000	Open fracture ankle, bimalleolar, low fibular fracture
S345100	Open fracture ankle, bimalleolar, high fibular fracture
S346.00	Closed fracture ankle, trimalleolar
S346000	Closed fracture ankle, trimalleolar, low fibular fracture
S346100	Closed fracture ankle, trimalleolar, high fibular fracture
S347.00	Open fracture ankle, trimalleolar
S347000	Open fracture ankle, trimalleolar, low fibular fracture
S347100	Open fracture ankle, trimalleolar, high fibular fracture
S348.00	Fracture of medial malleolus
S349.00	Fracture of lateral malleolus
S34x.00	Closed fracture ankle, unspecified
S34y.00	Open fracture ankle, unspecified
S34z.00	Fracture of ankle, NOS
S35..00	Fracture of one or more tarsal and metatarsal bones
S35..11	Metatarsal bone fracture
S35..12	Tarsal bone fracture
S350.00	Closed fracture of calcaneus
S350.11	Heel bone fracture
S350.12	Os calcis fracture
S350000	Closed fracture calcaneus, extra-articular
S350100	Closed fracture calcaneus, intra-articular
S351.00	Open fracture of calcaneus
S351000	Open fractures calcaneus, extra-articular
S351100	Open fractures calcaneus, intra-articular
S352.00	Closed fracture of other tarsal and metatarsal bones
S352.11	March fracture
S352000	Closed fracture of tarsal bone, unspecified
S352100	Closed fracture of talus
S352111	Closed fracture of astragalus
S352200	Closed fracture navicular
S352300	Closed fracture cuboid
S352400	Closed fracture medial cuneiform
S352500	Closed fracture intermediate cuneiform
S352600	Closed fracture lateral cuneiform
S352700	Closed fracture metatarsal
S352800	Closed fracture talus, head
S352900	Closed fracture talus, neck
S352A00	Closed fracture talus, body
S352B00	Closed fracture metatarsal base
S352C00	Closed fracture metatarsal shaft
S352D00	Closed fracture metatarsal neck
S352E00	Closed fracture metatarsal head
S352F00	Closed fracture metatarsal, multiple
S352G00	Closed tarsal fractures, multiple
S352H00	Closed fracture of cuneiforms
S352J00	Closed fracture of base of fifth metatarsal
S352z00	Closed fracture of one or more tarsal + metatarsal bones NOS
S353.00	Open fracture of other tarsal and metatarsal bones
S353000	Open fracture of tarsal bone, unspecified
S353100	Open fracture of talus
S353111	Open fracture of astragalus
S353200	Open fracture navicular
S353300	Open fracture cuboid
S353400	Open fracture medial cuneiform
S353500	Open fracture intermediate cuneiform
S353600	Open fracture lateral cuneiform
S353700	Open fracture metatarsal
S353800	Open fracture talus, head
S353900	Open fracture talus, neck
S353A00	Open fracture talus, body
S353B00	Open fracture metatarsal base
S353C00	Open fracture metatarsal shaft
S353D00	Open fracture metatarsal neck
S353E00	Open fracture metatarsal head
S353F00	Open fracture metatarsal, multiple
S353G00	Open tarsal fractures, multiple
S353H00	Open fracture cuneiforms
S353J00	Open fracture of base of fifth metatarsal
S353z00	Open fracture of tarsal and metatarsal bones NOS
S354.00	Fracture of calcaneus
S355.00	Fracture of talus
S356.00	Fracture of metatarsal bone
S35z.00	Fracture of tarsal and metatarsal bones NOS
S36..00	Fracture of one or more phalanges of foot
S36..11	Toe fracture
S360.00	Closed fracture of one or more phalanges of foot
S360000	Closed fracture proximal phalanx, toe
S360100	Closed fracture middle phalanx, toe
S360200	Closed fracture distal phalanx, toe
S360300	Closed fracture multiple phalanges, toe
S361.00	Open fracture of one or more phalanges of foot
S361000	Open fracture proximal phalanx, toe
S361100	Open fracture middle phalanx, toe
S361200	Open fracture distal phalanx, toe
S361300	Open fracture multiple phalanges, toe
S362.00	Fracture of great toe
S362000	Closed fracture of great toe
S362100	Open fracture of great toe
S363.00	Fracture of other toe
S36z.00	Fracture of one or more phalanges of foot NOS
S37..00	Fracture of lower limb, level unspecified
S370.00	Closed fracture of lower limb, level unspecified
S371.00	Open fracture of lower limb, level unspecified
S3X..00	Fracture of lower leg, part unspecified
S3x..00	Other, multiple and ill-defined fractures of lower limb
S3x0.00	Other, multiple and ill-defined closed fractures lower limb
S3x1.00	Other, multiple and ill-defined open fractures of lower limb
S3x2.00	Multiple fractures of femur
S3x3.00	Multiple fractures of lower leg
S3x4.00	Multiple fractures of foot
S3xz.00	Other, multiple and ill-defined fractures of lower limb NOS
S3z..00	Fracture of unspecified bones
S3z..11	Fracture NOS
S3z0.00	Closed fracture of bones, unspecified
S3z0000	Greenstick fracture
S3z1.00	Open fracture of bones, unspecified
S3z2.00	Stress fracture
S3zz.00	Fracture of bones NOS
S4...13	Fracture dislocations and fracture subluxations
S4A..00	Fracture-dislocation or subluxation shoulder
S4A0.00	Closed fracture-dislocation shoulder
S4A0000	Closed fracture-dislocation shoulder joint
S4A0100	Closed fracture-dislocation acromio-clavicular joint
S4A1.00	Open fracture-dislocation shoulder
S4A1000	Open fracture-dislocation shoulder joint
S4A1100	Open fracture-dislocation acromio-clavicular joint
S4A2.00	Closed fracture-subluxation shoulder
S4A2000	Closed fracture-subluxation shoulder joint
S4A2100	Closed fracture-subluxation acromio-clavicular joint
S4A3.00	Open fracture-subluxation shoulder
S4A3000	Open fracture-subluxation shoulder joint
S4A3100	Open fracture-subluxation acromio-clavicular joint
S4B..00	Fracture-dislocation or subluxation elbow
S4B0.00	Closed fracture-dislocation elbow
S4B0000	Closed fracture-dislocation elbow joint
S4B0100	Closed fracture-dislocation superior radio-ulnar joint
S4B1.00	Open fracture-dislocation elbow
S4B1000	Open fracture-dislocation elbow joint
S4B1100	Open fracture-dislocation superior radio-ulnar joint
S4B2.00	Closed fracture-subluxation elbow
S4B2000	Closed fracture-subluxation elbow joint
S4B2100	Closed fracture-subluxation superior radio-ulnar joint
S4B3.00	Open fracture-subluxation elbow
S4B3000	Open fracture-subluxation elbow joint
S4B3100	Open fracture-subluxation superior radio-ulnar joint
S4C..00	Fracture-dislocation or subluxation of wrist
S4C0.00	Closed fracture dislocation of wrist
S4C0000	Closed fracture-dislocation distal radio-ulnar joint
S4C0100	Closed fracture-dislocation radiocarpal joint
S4C0200	Closed fracture-dislocation mid carpal
S4C0300	Closed fracture-dislocation, carpometacarpal joint
S4C0400	Closed fracture-dislocation lunate (volar)
S4C0500	Closed fracture-dislocation peri-lunate (dorsal)
S4C0600	Closed fracture-dislocation peri-lunate trans-scaphoid
S4C0y00	Closed fracture-dislocation other carpal
S4C1.00	Open fracture dislocation wrist
S4C1000	Open fracture-dislocation, distal radio-ulnar joint
S4C1100	Open fracture-dislocation radiocarpal joint
S4C1200	Open fracture-dislocation mid carpal
S4C1300	Open fracture-dislocation carpometacarpal joint
S4C1400	Open fracture-dislocation lunate (volar)
S4C1500	Open fracture-dislocation peri-lunate (dorsal)
S4C1600	Open fracture-dislocation peri-lunate trans-scaphoid
S4C1y00	Open fracture-dislocation other carpal
S4C2.00	Closed fracture-subluxation of the wrist
S4C2000	Closed fracture-subluxation, distal radio-ulnar jt
S4C2100	Closed fracture-subluxation radiocarpal joint
S4C2200	Closed fracture-subluxation mid carpal
S4C2300	Closed fracture-subluxation, carpometacarpal joint
S4C2400	Closed fracture-subluxation lunate (volar)
S4C2500	Closed fracture-subluxation peri-lunate (dorsal)
S4C2600	Closed fracture-subluxation peri-lunate trans-scaphoid
S4C2y00	Closed fracture-subluxation other carpal
S4C3.00	Open fracture-subluxation of the wrist
S4C3000	Open fracture-subluxation, distal radio-ulnar joint
S4C3100	Open fracture-subluxation radiocarpal joint
S4C3200	Open fracture-subluxation mid carpal
S4C3300	Open fracture-subluxation, carpometacarpal joint
S4C3400	Open fracture-subluxation lunate (volar)
S4C3500	Open fracture-subluxation peri-lunate (dorsal)
S4C3600	Open fracture-subluxation peri-lunate trans-scaphoid
S4C3y00	Open fracture-subluxation other carpal
S4D..00	Fracture-dislocation/subluxation finger/thumb
S4D0.00	Closed fracture-dislocation digit
S4D0000	Closed fracture-dislocation digit, unspecified
S4D0100	Closed fracture-dislocation, metacarpophalangeal joint
S4D0200	Closed fracture-dislocation IPJ, unspecified
S4D0300	Closed fracture-dislocation, distal interphalangeal joint
S4D0400	Closed fracture-dislocation, proximal interphalangeal joint
S4D0500	Closed fracture-dislocation, interphalangeal joint thumb
S4D0600	Closed fracture-dislocation multiple digits
S4D1.00	Open fracture-dislocation digit
S4D1000	Open fracture-dislocation digit, unspecified
S4D1100	Open fracture-dislocation, metacarpophalangeal joint
S4D1200	Open fracture-dislocation IPJ, unspecified
S4D1300	Open fracture-dislocation, distal interphalangeal joint
S4D1400	Open fracture-dislocation, proximal interphalangeal joint
S4D1500	Open fracture-dislocation, interphalangeal joint thumb
S4D1600	Open fracture-dislocation multiple digits
S4D2.00	Closed fracture-subluxation digit
S4D2000	Closed fracture-subluxation digit, unspecified
S4D2100	Closed fracture-subluxation, metacarpophalangeal joint
S4D2200	Closed fracture-subluxation IPJ, unspecified
S4D2300	Closed fracture-subluxation, distal interphalangeal joint
S4D2400	Closed fracture-subluxation, proximal interphalangeal joint
S4D2500	Closed fracture-subluxation, interphalangeal joint thumb
S4D2600	Closed fracture-subluxation multiple digits
S4D3.00	Open fracture-subluxation digit
S4D3000	Open fracture-subluxation digit, unspecified
S4D3100	Open fracture-subluxation, metacarpophalangeal joint
S4D3200	Open fracture-subluxation IPJ, unspecified
S4D3300	Open fracture-subluxation, distal interphalangeal joint
S4D3400	Open fracture-subluxation, proximal interphalangeal joint
S4D3500	Open fracture-subluxation, interphalangeal joint thumb
S4D3600	Open fracture-subluxation multiple digits
S4E..00	Fracture-dislocation or subluxation hip
S4E0.00	Closed fracture-dislocation, hip joint
S4E1.00	Open fracture-dislocation, hip joint
S4E2.00	Closed fracture-subluxation, hip joint
S4E3.00	Open fracture-subluxation, hip joint
S4F..00	Fracture-dislocation or subluxation knee
S4F0.00	Closed fracture-dislocation, knee joint
S4F1.00	Open fracture-dislocation, knee joint
S4F2.00	Closed fracture-subluxation, knee joint
S4F3.00	Open fracture-subluxation, knee joint
S4F4.00	Closed fracture-dislocation, patello-femoral joint
S4F5.00	Open fracture-dislocation, patello-femoral joint
S4F6.00	Closed fracture-subluxation, patello-femoral joint
S4F7.00	Open fracture-subluxation, patello-femoral joint
S4G..00	Fracture-dislocation or subluxation ankle
S4G0.00	Closed fracture-dislocation, ankle joint
S4G1.00	Open fracture-dislocation, ankle joint
S4G2.00	Closed fracture-subluxation, ankle joint
S4G3.00	Open fracture-subluxation, ankle joint
S4H..00	Fracture-dislocation or subluxation foot
S4H0.00	Closed fracture-dislocation foot
S4H0000	Closed fracture-dislocation, subtalar joint
S4H0100	Closed fracture-dislocation, midtarsal joint
S4H0200	Closed fracture-dislocation, tarsometatarsal joint
S4H0400	Closed fracture-dislocation, IPJ, single toe
S4H0600	Closed fracture-dislocation, IPJ, multiple toes
S4H1.00	Open fracture-dislocation, foot
S4H1000	Open fracture-dislocation, subtalar joint
S4H1100	Open fracture-dislocation, midtarsal joint
S4H1200	Open fracture-dislocation, tarsometatarsal joint
S4H1300	Open fracture-dislocation, metatarsophalangeal joint, single
S4H1400	Open fracture-dislocation, IPJ, single toe
S4H1600	Open fracture-dislocation, IPJ, multiple toes
S4H2.00	Closed fracture-subluxation, foot
S4H2000	Closed fracture-subluxation, subtalar joint
S4H2100	Closed fracture-subluxation, midtarsal joint
S4H2200	Closed fracture-subluxation, tarsometatarsal joint
S4H2400	Closed fracture-subluxation, IPJ, single toe
S4H2600	Closed fracture-subluxation, IPJ, multiple toes
S4H3.00	Open fracture-subluxation, foot
S4H3000	Open fracture-subluxation, subtalar joint
S4H3100	Open fracture-subluxation, midtarsal joint
S4H3200	Open fracture-subluxation, tarsometatarsal joint
S4H3300	Open fracture-subluxation, metatarsophalangeal joint, single
S4H3400	Open fracture-subluxation, IPJ, single toe
S4H3600	Open fracture-subluxation, IPJ, multiple toes
S4J..00	Other fracture-dislocation or subluxation
S4J0.00	Other closed fracture-dislocation
S4J0000	Closed fracture-dislocation of sternum
S4J0100	Closed fracture-dislocation of pelvis
S4J1.00	Other open fracture-dislocation
S4J1000	Open fracture-dislocation of sternum
S4J1100	Open fracture-dislocation of pelvis
S4J1200	Open fracture-dislocation sterno-clavicular joint, anterior
S4J1300	Open fracture-dislocation sterno-clavicular joint, posterior
S4J2.00	Other closed fracture-subluxation
S4J2000	Closed fracture-subluxation of sternum
S4J2100	Closed fracture-subluxation of pelvis
S4J3.00	Other open fracture-subluxation
S4J3000	Open fracture-subluxation of sternum
S4J3100	Open fracture-subluxation of pelvis
S4J3200	Open fracture-subluxation sterno-clavicular joint, anterior
S4J3300	Open fracture-subluxation sterno-clavicular joint, posterior
SC00.00	Late effect of fracture of skull and face bones
SC00.11	Late effect of face fracture
SC00.12	Late effect of skull fracture
SC01.00	Late effect of fracture of spine/trunk without cord lesion
SC01000	Late effect of fracture of cervical vertebra
SC01100	Late effect of fracture of thoracic vertebra
SC01200	Late effect of fracture of lumbar vertebra
SC02.00	Late effect of fracture of arm
SC03.00	Late effect of fracture neck of femur
SC04.00	Late effect of other fracture of leg
SC05.00	Late effect of multiple and unspecified fracture of bones
SC0X.00	Sequelae of other fracture of thorax and pelvis
SC0z.11	Delayed union of fracture
SC20.00	Late effect of intracranial injury without skull fracture
SC3C000	Sequelae of fracture at wrist and hand level
SC3D400	Sequelae of fracture of femur
SP04A00	Fracture of bone autograft
SP04C00	Fracture of bone allograft
SP22400	Intra-operative fracture
SP22X00	# bone follow insertn/orthopaed implnt,jnt pros,bne plate
SR1..00	Fractures involving multiple body regions
SR10.00	Fractures involving head with neck
SR10000	Closed fractures involving head with neck
SR10100	Open fractures involving head with neck
SR11.00	Fractures involving thorax with lower back and pelvis
SR12.00	Fractures involving multiple regions of one upper limb
SR12000	Closed fractures involving multiple regions of one upp limb
SR12100	Open fractures involving multiple regions of one upper limb
SR13.00	Fractures involving multiple regions of one lower limb
SR14.00	Fractures involving multiple regions of both lower limbs
SR14000	Closd fractures involving multiple regions of both low limbs
SR14100	Open fractures involving multiple regions both lower limbs
SR15.00	Fract invol multiple regions of up limb(s) with low limb(s)
SR15000	Cl fractures involving multiple regions upper with lower lmb
SR15100	Open fracture involv multiple regions upper with lower lmb
SR16.00	Fract invol thorax with lower back and pelvis with limb(s)
SR16000	Closed fracture inv thorax wth low back and pelvis and limbs
SR16100	Open fracture inv thorax wth low back and pelvis and limbs
SR1z.00	Multiple fractures, unspecified
SR1z000	[X]Closed multiple fractures unspecified
SR1z100	[X]Open multiple fractures unspecified
Syu0300	[X]Fractures of other skull and facial bones
Syu0400	[X]Fracture of skull and facial bones, part unspecified
Syu1500	[X]Fracture of other specified cervical vertebra
Syu1600	[X]Fracture of other parts of neck
Syu2700	[X]Fracture of other parts of bony thorax
Syu2800	[X]Fracture of bony thorax, part unspecified
Syu3400	[X]Fract of other and unspec parts of lumbar spine & pelvis
Syu4200	[X]Multiple fractures of clavicle, scapula and humerus
Syu4300	[X]Fracture of other parts of shoulder and upper arm
Syu4400	[X]Fracture of shoulder and upper arm, unspecified
Syu5300	[X]Fracture of other parts of forearm
Syu5400	[X]Fracture of forearm, unspecified
Syu6300	[X]Fracture of other carpal bone(s)
Syu6400	[X]Fracture of other metacarpal bone
Syu6500	[X]Fracture of other & unspecified parts of wrist and hand
Syu7200	[X]Fractures of other parts of femur
Syu8300	[X]Fractures of other parts of lower leg
Syu8D00	[X]Fracture of lower leg, part unspecified
Syu9400	[X]Fracture of other tarsal bones
SyuA200	[X]Fractures involving other combinations of body regions
SyuBB00	[X]Fracture of unspecified body region
SyuL100	[X]Sequelae of other fracture of thorax and pelvis
SyuL400	[X]Sequelae of other fractures of lower limb
TC7..00	Fracture, cause unspecified
Z6G1900	Fracture - traction
Zw01.00	[Q] Fractures involving the epiphyseal plate
Zw02400	[Q] Stress fracture
Zw02500	[Q] Refracture
Zw02D00	[Q] Open fracture grade 1
Zw02E00	[Q] Open fracture grade 2
Zw02F00	[Q] Open fracture grade 3
Zw02G00	[Q] Open fracture grade 3A
Zw02H00	[Q] Open fracture grade 3B
Zw02J00	[Q] Open fracture grade 3C
